# Supplementary material
Source: PubMed Central journal article supplement (PMC5116728)
Supplement: IAI.00734-16_zii999091899so1.pdf [file IAI.00734-16_zii999091899so1.pdf]

1 **Supplemental Figure**

2 **Figure S1: Screening of the MGD::kan library in C2BBE1 epithelial cells.** Caco-2 C2BBE1  
3 cells were seeded in 48-well plates and infected with *S. Typhimurium* 14028s wild type (WT) or  
4 MGD::kan strain (genetic regions deleted in each MGD mutant are indicated). The MOI was  
5 100, except where indicated by #, in which case the MOI was 1000. \* indicates strains that were  
6 non-invasive or very poorly invasive. These bacteria were added to monolayers at an MOI of  
7 100, followed by centrifugation at 600 xg for 5 min. The proportion of cytosolic:vacuolar bacteria  
8 at 7 h p.i. was determined by the CHQ resistance assay (CHQ-resistant CFU/(Total CFU-CHQ-  
9 resistant CFU)). Each data point is the average of duplicate wells from 1-5 independent  
10 experiments. The shaded area indicates 14028s wild type mean  $\pm$  2SD. Arrows indicate MGD  
11 mutants that were the focus of this study.



Table S1: Oligonucleotides used in this study

| Oligonucleotide name | Sequence (5'-3')                                                | For construction of |
|----------------------|-----------------------------------------------------------------|---------------------|
| asmA F2              | GGCTCTGCCCTTTGGCCAAAA <b>CTACAT</b> GCTACCCTCAATGGACCGGCAG      | $\Delta$ asmA       |
| asmA R1              | CTGCCGGTCCATTGAGGGTAGC <b>ATGTAG</b> TTTTTTGGCCAAAGGGCAGAGCC    | $\Delta$ asmA       |
| asmA-XbaF1           | GCTCTAGAACTGACCGACGCGCGTTTTG                                    | $\Delta$ asmA       |
| asmA-XmaR2           | <u>TCCCCCGGGGCCGTTTTCTTTCCGCTAAC</u>                            | $\Delta$ asmA       |
| corA OL-F            | CCGGT <b>CATG</b> CTGAGCTGGCTG <b>TAAG</b> ACATTAAGGCCAGGGTG    | $\Delta$ corA       |
| corA OL-R            | AATGT <b>CTTAC</b> AGCCAGCTCAG <b>CATG</b> ACCGGGACTCCCAATG     | $\Delta$ corA       |
| Xma corA             | <u>CCCCCGGGGCCATGCAGAACTGACGCTAAC</u>                           | $\Delta$ corA       |
| Kpn corA new         | <u>GGGGTACCATATTGTCATGCTAACGACG</u>                             | $\Delta$ corA       |
| Hha OL-F             | GAATTT <b>ATG</b> TCTGATATTCGTT <b>AAT</b> CACGCTACATTACTTTTTAG | $\Delta$ hha        |
| Hha OL-R             | GCGTG <b>ATTA</b> ACGAATATCAG <b>ACATA</b> AATTCTACCTATGATTG    | $\Delta$ hha        |
| XmaI hha             | <u>CCCCCGGGCTGTTATCGCGTTTTTCACGG</u>                            | $\Delta$ hha        |
| KpnI hha             | <u>GGGGTACCATCCTTACTGCGTTAAAGGC</u>                             | $\Delta$ hha        |
| recA F2              | CCGCCCCACCATCACCTGATG <b>ATTACATT</b> ATTACTCCTGTCATGCAACTT     | $\Delta$ recA       |
| recA R1              | AAGTTGCATGACAGGAGTAATA <b>ATGTAAT</b> CATCAGGTGATGGTGGGGCGG     | $\Delta$ recA       |
| recA-XmaF1           | <u>TCCCCCGGGATTGGTAAACAACAGAGTG</u>                             | $\Delta$ recA       |
| recA-XbaR2           | GCTCTAGACTATATCCCAGACATCCC                                      | $\Delta$ recA       |
| recA-BamHIF          | CCACCGGGATCCACAGCCGTAGTTGACAGG                                  | pWSK29-recA         |
| recA-KpnIR           | CTTGGGGGTACCTTAACGTTTTGCTGAATGG                                 | pWSK29-recA         |
| srlR F2              | ATAAGTCAGGGTAATCACGCCT <b>ATGTGAT</b> GCACTACTAAACGCGGGCCGT     | $\Delta$ srlR       |
| srlR R1              | ACGGCCCCGCGTTTAGTAGTG <b>CACAT</b> AGGCGTGATTACCCTGACTTAT       | $\Delta$ srlR       |
| srlR-Kpn2R2          | <u>GGGGTACCGACGCCTTTCACAACATG</u>                               | $\Delta$ srlR       |
| srlR-Xba2F1          | GCTCTAGACTGGGCATTAAGCCC                                         | $\Delta$ srlR       |
| ydgT F2              | TTGATGTTAAACGCTACTTTCTTT <b>ACAT</b> ATTAAATATAATGCCAACGGAG     | $\Delta$ ydgT       |
| ydgT R1              | CTCCGTTGGCATTATATTTAAT <b>ATGTA</b> AAGAAAGTAGCGTTTAAACATCAA    | $\Delta$ ydgT       |
| ydgT-KpnF1           | <u>GGGGTACCCCAAGAACCGCACAGTTAG</u>                              | $\Delta$ ydgT       |
| ydgT-XbaR2           | GCTCTAGACGCGCCTGTGACAGTGTCAC                                    | $\Delta$ ydgT       |
| ydgT-KpnIF           | <u>CGGGGTACCTTGTGGAAGACGGAAAGTACC</u>                           | pWSK29-ydgT (1)     |
| ydgT-SacIR           | CCGAGCTCAACGCTACTTTCTTTATTGCACA                                 | pWSK29-ydgT (1)     |

Start and stop codons are in bold. Engineered restriction sites are underlined.

1. **Coombes BK, Wickham ME, Lowden MJ, Brown NF, Finlay BB.** 2005. Negative regulation of *Salmonella* pathogenicity island 2 is required for contextual control of virulence during typhoid. Proc Natl Acad Sci USA **102**:17460-17465.
